# Supplementary material
Source: Research Square preprint supplement (doi:10.21203/rs.3.rs-9439963/v1)
Supplement: Supplementary file 1 [file ef0995788f5fda3f3fbd4cce.docx]

**Comparison of Mental Health Symptoms Prior to and During COVID-19: Evidence from an Updated Systematic Review and Meta-analysis of 186 Cohorts**

Ying Sun, research coordinator1,2; Yin Wu, research professor1,3,4; Suiqiong Fan, research coordinator1; Letong Li, research assistant1; Xiaowen Jiang, research assistant1; Amina Tasleem, research assistant1; Kexin Li, research assistant1; Yutong Wang, doctoral student1,5; Tiffany Dal Santo, masters student1,3; Nadia P. González-Domínguez, research coordinator1; Jill T. Boruff, associate librarian6; Palak Desai, research assistant1; Brienne Tougas, research assistant1; Monica D’Onofrio, masters student1,5; Ankur Krishnan, research coordinator1; Claire Adams, postdoctoral fellow1,3; Chen He, research coordinator1; Richard Henry, postdoctoral fellow1,3; Afra Alkan, postdoctoral fellow1,5; Danielle B. Rice, assistant professor7,8; Sarah Markham, visiting researcher9; Elsa-Lynn Nassar, doctoral student1,10; Sophie Hu, masters student1,5; Dipika Neupane, research coordinator1; Lara Amiri, research assistant1; Ian Thombs-Vite, research assistant1; Enqi Wang, research assistant1; Gabriel Chun Yin Sung, student intern1; Gabrielle Virgili-Gervais, biostatistician1; Meghan Grundmann, research assistant7; Marieke Neyer, masters student1; Dickens Akena, senior lecturer11; Hamid Baradaran, professor12; Branka Agic, assistant professor13,14; Genesis Chorwe-Sungani, associate professor15; Christine Fahim, scientist16; Paula M. Luz, associate professor17; Michael S. Martin, adjunct professor and director of epidemiology18,19; Tiago Munhoz, professor20,21; Arijit Nandi, associate professor5; Sanjeev Sockalingam, professor13,22; Machelle Wilchesky, associate professor1,23; Andrea Benedetti, associate professor5,24,25; Brett D. Thombs, professor1,3,5,24

1Lady Davis Institute for Medical Research, Jewish General Hospital, Montréal, Québec, Canada; 2Department of Epidemiology, Johns Hopkins Bloomberg School of Public Health, Baltimore, Maryland, USA; 3Department of Psychiatry, McGill University, Montréal, Québec, Canada; 4School of Public Health, Shanghai Jiao Tong University, Shanghai, China; 5Department of Epidemiology, Biostatistics and Occupational Health, McGill University, Montréal, Québec, Canada; 6Schulich Library of Physical Sciences, Life Sciences, and Engineering, McGill University, Montréal, Québec, Canada; 7 Research Institute of St. Joe’s Hamilton, Hamilton, Ontario, Canada; 8Department of Psychiatry and Behavioural Neurosciences, McMaster University, Hamilton, Ontario, Canada; 9Department of Biostatistics and Health Informatics, King's College London, London, UK; 10Department of Psychology, McGill University, Montréal, Québec, Canada; 11Department of Psychiatry, Makerere University College of Health Sciences, Kampala, Uganda; 12Endocrine Research Center, Institute of Endocrinology and Metabolism, Iran University of Medical Sciences, Tehran, Iran; 13Centre for Addiction and Mental Health, Toronto, Ontario, Canada; 14Dalla Lana School of Public Health, University of Toronto, Toronto, Ontario, Canada; 15Department of Mental Health, School of Nursing, Kamuzu University of Health Sciences, Blantyre, Malawi; 16Li Ka Shing Knowledge Institute, Unity Health Toronto, Toronto, Ontario, Canada; 17Instituto Nacional de Infectologia Evandro Chagas, Fundação Oswaldo Cruz, Rio de Janeiro, Brasil; 18School of Epidemiology and Public Health, University of Ottawa; Ontario, Canada; 19Correctional Service of Canada, Ottawa, Ontario, Canada; 20Department of Clinical Psychology, Federal University of Pelotas, Pelotas, RS, Brazil; 21Postgraduate Program in Epidemiology, Federal University of Pelotas, Pelotas, RS, Brazil; 22Department of Psychiatry, University of Toronto, Toronto, Ontario, Canada; 23Department of Family Medicine, McGill University, Montréal, Québec, Canada; 24Department of Medicine, McGill University, Montréal, Québec, Canada; 25Respiratory Epidemiology and Clinical Research Unit, McGill University Health Centre, Montréal, Québec, Canada.

**Corresponding author:**

Brett D. Thombs, PhD; Jewish General Hospital; 3755 Cote Ste-Catherine, Pavilion H4.83; Montreal, Quebec H3T 1E2; Tel (514) 340-8222 ext. 24244; E-mail: [brett.thombs@mcgill.ca](mailto:brett.thombs@mcgill.ca)

ORCID: 0000-0002-5644-8432

**Word count:** 4,398

**ABSTRACT**

**Objectives:** We previously synthesized evidence on mental health changes from pre-COVID-19 to during COVID-19 among 134 cohorts published up to April 2022. Our objective was to update our synthesis to provide comprehensive evidence of changes in general mental health, depression symptoms, and anxiety symptoms from prior to the pandemic to during the pandemic.

**Design**: Systematic review.

**Data Sources:** MEDLINE, PsycINFO, CINAHL, EMBASE, Web of Science, China National Knowledge Infrastructure, Wanfang, medRxiv, Open Science Framework Preprints.

**Eligibility criteria for selecting studies:** We included studies that compared general mental health, anxiety symptoms, or depression symptoms, assessed January 1, 2020 or later, to outcomes collected January 1, 2018 to December 31, 2019 in any population. We required ≥ 90% of participants pre-COVID-19 and during COVID-19 be the same or that statistical methods were used to address missing data. We conducted restricted maximum-likelihood random-effects meta-analyses (worse COVID-19 outcomes representing positive change) for the general population and subgroups with at least two studies in an outcome domain. Risk of bias was assessed using an adapted Joanna Briggs Institute Checklist for Prevalence Studies.

**Results:** We searched up to April 3, 2023, reviewed 149,026 unique citations, and included 178 studies with non-overlapping data from 186 cohorts. Most studies reported COVID-19 outcomes collected in 2020 (158 studies, 89%) and were from high-income (135 studies, 76%) or upper-middle income (36 studies [30 from China], 20%) countries. Among general population studies, we did not find changes in anxiety symptoms (standardized mean difference [SMDchange] = 0.07, 95% CI -0.29 to 0.42), but general mental health (SMDchange = 0.11, 95% CI 0.01 to 0.20) and depression symptoms (SMDchange = 0.07, 95% CI 0.00 to 0.14) worsened minimally. Among women or females, general mental health (SMDchange = 0.14, 95% CI 0.00 to 0.28), anxiety symptoms (SMDchange = 0.18, 95% CI 0.09 to 0.27), and depression symptoms (SMDchange = 0.15, 95% CI 0.05 to 0.26) all worsened by minimal amounts. Among children and adolescents, both general mental health (SMDchange = 0.10, 95% CI 0.03 to 0.17), and depression symptoms (SMDchange = 0.09, 95% CI 0.03 to 0.16) worsened minimally. In 24 other analyses across outcome domains among subgroups, 4 analyses suggested minimal to small symptom worsening, and 1 suggested minimal improvement, and no other subgroup had significant change for more than 1 outcome domain. There were only 5 studies from lower-middle-income countries, and none from low-income countries. Among potentially marginalized groups, we identified one eligible study on prisoners, 3 on sexual or gender minorities, but no studies on other groups, such as racial and ethnic minority groups or those experiencing housing insecurity or homelessness. Substantial heterogeneity and risk of bias were present across analyses.

**Conclusions:** High risk of bias in many studies and substantial heterogeneity suggest caution in interpreting results. Nonetheless, most symptom change estimates were close to zero and not statistically significant, and significant changes were of minimal to small magnitudes. There were small negative changes for women or females in all domains.

**Funding:** Canadian Institutes of Health Research (PJT-195921; CMS-171703; MS1-173070; GA4-177758; WI2-179944); McGill Interdisciplinary Initiative in Infection and Immunity Emergency COVID-19 Research Fund (R2-42).

**Registration:** PROSPERO (CRD42020179703); registered on April 17, 2020.

**INTRODUCTION**

The sheer volume and low quality of COVID-19 mental health data have posed barriers to effective evidence synthesis, evaluating possible long-term mental health implications, and understanding how large-scale societal disasters may influence mental health.1-4 Many systematic reviews have synthesized results from cross-sectional studies with no pre-COVID-19 comparison that evaluated proportions of participants with scores above thresholds on mental health questionnaires and interpreted results as “prevalence” of mental health problems, even though these tools are not designed to estimate prevalence.5, 6 Few reviews have synthesized evidence from longitudinal studies that compared symptom levels during COVID-19 with pre-pandemic levels in the same cohort. One systematic review reported a minimal to small increase in mental health symptoms in 65 studies with data from 2020 and no population restrictions (standardized mean difference [SMDchange] = 0.11, 95% confidence interval [CI] 0.04 to 0.17).7 A second included both general population longitudinal studies and repeated cross-sectional studies (data drawn from sampling the same population at different time points) published up to March 2021 and reported that anxiety (10 studies, SMDchange = 0.16, 95% CI 0.03 to 0.29) and depression (18 studies, SMDchange = 0.22, 95% CI 0.11 to 0.33) symptoms increased by small amounts in the pandemic.8 A third found increases in depression (SMDchange = 0.26, 95% CI 0.19 to 0.33) and anxiety (SMDchange = 0.10, 95% CI 0.04 to 0.16) symptoms in 53 studies of children and adolescents published up to May 2022.9

We previously synthesized evidence on the general population and 11 subgroups from 137 studies published up to April 2022 that included data prior to and during the pandemic. We found that most symptom change estimates for general mental health, anxiety symptoms, and depression symptoms were close to zero and not statistically significant and that significant changes were of minimal to small magnitudes.10 However, there was high risk of bias in most studies and heterogeneity was substantial.

The objective of the present systematic review was to update our previous findings to provide a comprehensive synthesis of changes in mental health symptoms from prior to the COVID-19 pandemic to during the pandemic.

**METHODS**

This study was part of a set of systematic reviews on COVID-19 mental health. Our set of systematic reviews was registered in PROSPERO (CRD42020179703), and a protocol was posted pre-initiation (https://osf.io/96csg/).11 Results are reported in accordance with the PRISMA statement.12 The present report includes results from studies that compared mental health during COVID-19 and pre-pandemic. Results from studies that assessed participants longitudinally after the start of the pandemic are synthesized in a separate report.13 Because of the overlap of the methods in the present study and previous studies, we described the methods similarly and followed reporting guidance from the Text Recycling Research Project.14

**Eligible Studies**

Studies on any population were included if they compared eligible outcomes assessed January 1, 2018 to December 31, 2019, when China first reported COVID-19 to the World Health Organization (WHO),15 to the same outcomes collected starting January 1, 2020 during the pandemic period, which the WHO declared to have ended May 5, 2023.16 Studies had to report data from cohorts with at least 90% of the same participants pre- and during COVID-19 or use statistical methods to account for missing data. We did not include repeated cross-sectional surveys. Studies with < 100 participants were excluded for feasibility reasons and due to their limited relative value in evaluating mental health changes.

Eligible outcomes were continuous scores on validated mental health symptom questionnaires. In our main systematic review, outcomes were defined broadly to include, for example, anxiety symptoms, depression symptoms, general mental health, stress, loneliness, anger, grief, and burnout. In the present report, we included only general mental health (e.g., general symptoms, mental health quality of life), anxiety symptoms, and depression symptoms because few studies reported eligible data for other outcomes.

**Identification and Selection of Eligible Studies**

We searched MEDLINE (Ovid), PsycINFO (Ovid), CINAHL (EBSCO), EMBASE (Ovid), Web of Science Core Collection: Citation Indexes, China National Knowledge Infrastructure, Wanfang, medRxiv, and Open Science Framework Preprints using a strategy designed by an experienced health sciences librarian. Because of the need for rapid evidence in the early pandemic, we did not formally peer review the search strategy; however, COVID-19 terms were developed in collaboration with other librarians working on the topic and updated as COVID-19-specific subject headings became available. See Supplementary Material 1. We initially searched from December 31, 2019 to April 13, 2020, then searched daily until December 28, 2020, then weekly thereafter with the final searches done on April 3, 2023. Additionally, we reviewed reference lists of other systematic reviews that similarly included longitudinal data.

Search results were uploaded into DistillerSR (Evidence Partners, Ottawa, Canada), where duplicate references were identified and removed. Two independent reviewers evaluated titles and abstracts in random order. If either deemed a study potentially eligible, a full-text review was completed, also by two independent reviewers. Any discrepancies were resolved through consensus, with a third investigator consulted as necessary. An inclusion and exclusion coding guide was developed and pre-tested, and team members were trained over several sessions. See Supplementary Material 2.

**Data Extraction and Synthesis**

For each included study, one reviewer extracted data using a standardized form, and a second reviewer validated the extracted data using the DistillerSR Quality Control function. Reviewers extracted (1) publication characteristics (e.g., first author, publication year, journal); (2) population characteristics and demographics, including study eligibility criteria, recruitment method, number of participants, assessment timing, age, and population group (general population, older adults, young adults, university students, children and adolescents, parents, people with pre-existing medical conditions, people with pre-existing mental health conditions, medical staff, teachers, caregivers of people with a medical condition, prisoners, and groups defined by sex or gender in the present report, though we attempted to extract for any group for which we found data); (3) mental health outcomes; and (4) adequacy of study methods and reporting. We used World Bank classifications for country income and region.17 We adapted the Joanna Briggs Institute Checklist for Prevalence Studies to assess risk of bias and adequacy of study methods and reporting (sampling frame, recruiting methods, sample size, setting and participant descriptions, participation or response rate, outcome assessment methods, standardization of assessments, statistical analyses, follow-up rate).18 See Supplementary Material 3.

We extracted raw means and standard deviations (SDs), if available, and we estimated means and SDs from reported quantiles19 for studies that only reported those results. If provided, we extracted an SMD effect size with 95% CIs for change from pre-COVID-19 to during COVID-19. If not provided, we calculated Hedges’ g20 as described by Borenstein et al.21 SMDs were calculated as positive when mental health worsened and negative when it improved. We prioritized continuous data due to pitfalls in interpreting proportions of participants crossing a dichotomous threshold; thresholds on different symptom measures are often located at different places in the symptom distribution. This can lead to divergent estimates of proportions crossing a threshold, depending on the measure used rather than actual differences in symptom changes (see Supplementary Material 4). For studies that reported outcomes for multiple timepoints during COVID-19, we included the earliest timepoint in the present synthesis and reported longitudinal findings during the pandemic separately.13

For each population group with continuous outcomes for at least two studies in a domain (general mental health, anxiety symptoms, depression symptoms), SMDs were pooled via restricted maximum-likelihood random-effects meta-analysis. Heterogeneity was assessed with I2. For studies with more than one continuous outcome in a domain (e.g., two depression symptom measures), we pooled SMDs within the study prior to fitting the meta-analysis. Meta-analyses were performed in R (R version 4.3.1, RStudio Version 2023.12.0+369) using the rma.uni function in the metafor package.22 Forest plots were generated using the forest.rma function in metafor. We characterized changes as minimal (SMD < 0.20), small (SMD = 0.20), medium (SMD = 0.50), or large (SMD = 0.80).23

**Patient and Public Involvement**

Dr. Sarah Markham, an experienced patient advisor and member of BMJ’s International Patient Panel, was a research team member from project inception. She provided input on project design, underwent training on study procedures, and was involved in selection of eligible studies. She provided comments on the content of this article.

**Amendments to Protocol**

Amendments from the original protocol, including implementation of a process to identify potentially problematic studies, are described in Supplementary Material 5. In accordance with the Cochrane Database of Systematic Reviews policy,24 we incorporated a process to identify implausible data patterns that raised substantial concerns regarding the accuracy or integrity of reported results.

**RESULTS**

Main results are provided in this section with a more detailed version in Supplementary Material 6.

**Search Results and Selection of Eligible Studies**

We identified 54,615 unique citations in our updated search (in addition to the 94,411 reviewed for the original review; 149,026 total). In the update, we excluded 53,006 citations after title and abstract review and 1,379 after full-text review, leaving 230 publications with longitudinal data. Of those, 143 publications were of studies that did not include pre-COVID-19 data, 2 only assessed outcomes (e.g., loneliness, stress) not included in the present report, 22 only reported dichotomous results, 12 only reported results in formats that could not be converted to SMDs (e.g., model parameters, change scores), and 7 were duplicate publications of samples of already included cohorts and results. We excluded 4 studies as potentially problematic due to reported data patterns that were discrepant with other data within the study or deemed implausible (see Supplemental Material 6), leaving 40 eligible publications from the updated search. We identified 1 additional publication and cohort from our review of other systematic reviews. From the previous review, we had 137 publications from 139 cohorts. Thus, the final sample was comprised of 178 publications or studies with non-overlapping data from 186 unique cohorts, of which 8 contained two separate cohorts (Figure 1).

**Characteristics of Included Studies**

Supplementary Table 1 shows included study characteristics. Most studies (158 of 178, 89%) reported COVID-19 outcome data collected in 2020; 11 studies (6%) collected data between 2020 and 2021, and 9 studies collected data in 2021 (5%). There were 135 (76%) studies from 27 high-income countries or regions, 36 (20%) from 4 upper-middle-income countries including 30 from China, 2 (1%) studies that mixed high-income and upper-middle-income country samples, 5 (3%) studies from lower-middle-income countries, and none from low-income countries. There were 58 (33%) studies from Europe and Central Asia, 56 (31%) from East Asia and the Pacific, 47 (26%) from North America, and 17 (10%) from other regions. There were 129 (72%) studies of adult populations and 49 (28%) of children or adolescents, including 46 that focused on adolescents (ages 10 to 19), and 3 on children (ages up to 9 years old).

**Risk of Bias and Adequacy of Study Methods and Reporting**

Ratings of risk of bias and adequacy of methods and reporting are shown in Supplementary Table 2. Overall, 42 of 178 studies (24%) used sampling frames that closely represented the target population; 36 of 178 (20%) used census or random sampling methods; 20 of 178 (11%) had initial response rates ≥ 75%, and 65 of 178 (37%) successfully followed up with ≥ 75% of participants or included methods to address loss to follow-up. “Yes” ratings that reflect low risk of bias were between 76% and 100% for sample size, participant and setting description, valid assessment methods, standard outcome collection methods, and appropriately analysed results.

**Mental Health Symptom Changes**

Mental health symptom changes for individual studies by population category are shown in Supplementary Table 3 for general mental health, Supplementary Table 4 for anxiety symptoms, and Supplementary Table 5 for depression symptoms. Table 1 shows meta-analysis results.

*General Mental Health*

Forest plots of main analyses are shown in Supplementary Figures 1a to 1j. We estimated that general mental health worsened minimally in the general population (Supplementary Figure 1a; 15 cohorts, N = 34,135, SMDchange = 0.11, 95% CI 0.01 to 0.20; I2 = 97.0%). Among subgroups, there was a minimal, statistically significant worsening for women or females (Supplementary Figure 1b; 7 cohorts, N = 11,224; SMDchange = 0.14, 95% CI 0.00 to 0.28; I2 = 93.8%), children and adolescents (Supplementary Figure 1g; 26 cohorts, N = 27,888; SMDchange = 0.10, 95% CI 0.03 to 0.17; I2 = 93.9%), and people with pre-existing medical conditions (Supplementary Figure 1i; 13 cohorts, N = 7,204; SMDchange = 0.10, 95% CI 0.01 to 0.19; I2 = 83.6%). No other subgroup changes were statistically significant or substantively different from zero. I2 across analyses was high (83.6% to 98.6%).

*Anxiety Symptoms*

Forest plots are shown in Supplementary Figures 2a to 2k. Change in anxiety symptoms was minimal and not statistically significant for general population cohorts (Supplementary Figure 2a; 6 cohorts, N = 3,291; SMDchange = 0.07, 95% CI -0.29 to 0.42; I2 = 97.5%). Anxiety symptoms worsened statistically significantly by a minimal to small amount among women or females (Supplementary Figure 2b; 8 cohorts, N = 3,875; SMDchange = 0.18, 95% CI 0.09 to 0.27; I2 = 53.8%). Estimates were non-statistically significant and close to zero for all other subgroups. I2 was 53.8% for women or females and 72.0% for men or males, but higher for other subgroups (80.7% to 97.5%).

*Depression Symptoms*

Forest plots are shown in Supplementary Figures 3a to 3l. In general population cohorts, depression symptoms worsened by a statistically significant minimal amount (Supplementary Figure 3a; 10 cohorts, N = 23,826; SMDchange = 0.07, 95% CI 0.00 to 0.14; I2 = 82.0%). Depression symptoms increased significantly by minimal to small amounts among women or females (Supplementary Figure 3b; 18 cohorts, N = 16,258; SMDchange = 0.15, 95% CI 0.05 to 0.26, I2 = 94.9%), older adults (Supplementary Figure 3d; 11 cohorts, N = 25,059; SMDchange = 0.21, 95% CI 0.08 to 0.34, I2 = 97.7%), children and adolescents (Supplementary Figure 3g; 30 cohorts, N = 44,286; SMDchange = 0.09, 95% CI 0.03 to 0.16, I2 = 95.3%), parents (Supplementary Figure 3h; 9 cohorts, N = 3,742; SMDchange = 0.14, 95% CI 0.03 to 0.25, I2 = 80.8%), and people who identified as sexual or gender minorities (Supplementary Figure 3k, 3 cohorts, N = 3,741; SMDchange = 0.19, 95% CI 0.10 to 0.28; I2 = 67.1%). They improved minimally for people with pre-existing mental health conditions (Supplementary Figure 3j, 4 cohorts, N = 12,497; SMDchange = -0.06, 95% CI -0.08 to -0.03; I2 = 0%). I2 was 0% for people with pre-existing mental health conditions and medical staff, and 67.1% to 98.0% in other populations.

**DISCUSSION**

**Principal Findings**

We reviewed over 149,000 citations and included 178 studies on 186 unique cohorts that compared mental health during COVID-19 to assessments done prior to COVID-19. Most studies (169 of 178) assessed COVID-19 symptoms during at least one time point in 2020, of which 11 reported results from periods that spanned 2020 into 2021. Nine studies reported results from 2021 only.

As in our initial systematic review,10 which included 139 unique cohorts with results published up to April 11, 2022, there was substantial heterogeneity in almost all analyses, and findings should be interpreted cautiously. Nevertheless, there was a consistent pattern across analyses in that most estimates of symptom changes were close to zero and not statistically significant, and the few statistically significant changes we identified were minimal to small in magnitude.

Among general population studies, we found statistically significant changes in general mental health (SMDchange 0.11) and depression symptoms (SMDchange 0.07), but not anxiety symptoms. The magnitude of all change estimates, however, was minimal and close to zero. Among population groups and symptom outcome domains with more than one eligible study, the only group with worsened symptoms compared to pre-pandemic across all 3 outcome domains was women or females; changes in all outcome domains were minimal to small (SMDchanges 0.14 to 0.18). Among 13 other groups, we conducted 28 analyses with at least 3 studies. Among these, children and adolescents experienced symptoms worsening in general mental health and depression by minimal amounts (SMDchanges 0.09 to 0.10), but not in anxiety symptoms. All other subgroups experienced changes in symptoms in one domain or no domains. General mental health symptoms worsened by a minimal amount for people with pre-existing medical conditions (SMDchange = 0.10). Depression symptoms worsened by minimal to small amounts for older adults and parents (SMDchanges 0.14 to 0.21). Depression symptoms improved minimally for people with pre-existing mental health conditions (SMDchange = -0.06).

We did not synthesize results by country income level. There were 135 high-income countries (27 countries or regions) and 36 upper-middle-income countries (4 countries), but 30 of the studies from upper-middle-income countries were from China. Two studies mixed high-and upper-middle-income country data. There were only 5 studies from lower-middle-income countries, and none from low-income countries. Among potentially marginalized groups, we identified one eligible study on prisoners, 3 on sexual or gender minorities, but no studies on other groups, such as racial and ethnic minority groups and those experiencing housing insecurity or homelessness.

**Comparison with Other Studies**

Our finding that mental health was either unchanged or worsened by minimal to small amounts in the general population and adult subgroups is consistent with results from the previous version of our systematic review10 and generally consistent with other reviews that compared symptoms during COVID-19 with pre-pandemic levels. Robinson et al. reviewed 65 studies with data from before and during the pandemic published up to January 2021 and found a small increase in mental health symptoms in 2020 (SMDchange = 0.11).7 Salanti et al.8 found small changes in anxiety symptoms (10 studies, SMDchange 0.16) and depression symptoms (18 studies, SMDchange 0.22) in longitudinal studies and repeated cross-sectional panels published up to March 2021. Similar to our findings, heterogeneity was substantial in both systematic reviews.

Salanti et al.8 separately reported what they described as prevalence of mental symptoms in studies published up to August 2021 by aggregating proportions of participants above different symptom measure and threshold combinations. They reported that the odds ratios (ORs) for depression (10 studies, OR 2.1) and anxiety (9 studies, OR 2.1) increased significantly, but that the ORs did not increase significantly for 5 other conditions (psychological distress, sleep disturbance, alcohol or substance abuse, mental well-being, attention deficit hyperactivity disorder; 1 to 7 studies each). The measures and thresholds, however, that were aggregated differed substantially across included studies. For example, the depression analysis included 10 studies that used 5 different measures; among 4 studies that used the PHQ-9, 2 used a case threshold of 5 or greater, one used 7 or greater, and one did not report its threshold. These cutoffs are all substantially lower than typically used cutoffs. Additionally, in the depression and anxiety analyses, by far the largest and most heavily weighted study was a United States Census survey that assessed symptoms 4 times between April and May 2020 using 2-item measures.25 This study reported odds ratios more than twice as large as almost any other included study. In their analyses, Salanti et al.8 included 2 of the 4 assessments in 2020 from this study for both depression and anxiety symptoms, which would have increased estimates, potentially substantially, by double-counting this study.

We know of only one study that has evaluated mental disorders using validated diagnostic methods. That study, from Norway,26 was not eligible for our review, because it evaluated prevalence of current mental disorders in a series of cross-sectional random samples accumulated from January 28 to March 11, 2020 (N = 563, 15.4%, 95% CI 12.5% to 18.8%), March 12 to May 31, 2020 (N = 691, 9.0%, 95% CI 7.1% to 11.4%), June 1 to July 31, 2020 (N = 530, 14.3%, 95% CI 11.5% to 17.5%), and August 1 to September 18, 2020 (N = 370, 11.9%, 95% CI 9.0% to 15.6%) but not prior to 2020. The authors concluded that mental health disorder prevalence was stable or slightly decreased from January to March 2020 versus later in 2020 when the pandemic was underway in Norway.

Our finding that children and adolescents experienced minimal, albeit statistically significant, symptom worsening in general mental health (SMDchanges = 0.10) and depression (SMDchanges = 0.09), but not anxiety symptoms, differs somewhat from two existing systematic reviews that focused on children and adolescents.9, 27 Miao et al. (2023)27 included 20 longitudinal studies from 11 countries, published between January 2020 and August 2022 and found that there was an increase in anxiety and depression symptoms from before to during the pandemic (Anxiety: SMD = 0.18, 95 % CI 0.05 to 0.32); Depression: SMD = 0.22, 95 % CI 0.13 to 0.32). Madigan et al. (2023)9 included 53 longitudinal studies from 12 countries published from January 2020 to May 2022, of which 20 were included in our review (one under pre-existing mental health condition instead of children and adolescents). They reported an increase in depression symptoms (49 studies, SMD = 0.26; 95% CI, 0.19 to 0.33) and anxiety symptoms (38 studies, SMD = 0.10; 95% CI, 0.04 to 0.16) during the COVID-19 pandemic. We also found statistically significant worsening of depression symptoms among children and adolescents but by a minimal amount (SMDchanges = 0.09). It is possible that differences may be due to inclusion criteria. Among the 33 studies that were included in the Madigan et al.9 but not ours, 29 were excluded at full text review for not meeting the eligibility criteria, including 14 with N < 100 participants, 6 studies that included pre-COVID-19 data from prior to 2018, 3 studies for large differences in the participants compared pre- and during COVID, and other reasons (e.g., reporting of only dichotomous results, pre-COVID-19 assessments as late as April 2020).

Studies on suicide provide a “hard” mental health outcome, and results from these studies are consistent with our findings on mental health symptoms. A 2024 systematic review28 identified 34 studies that included data from over 40 countries and regions and reported a pooled suicide mortality rate of 11.4 per 100,000 (95%CI 9.4 to 13.4) before the pandemic and 10.7 per 100,000 (95%CI 8.6 to 12.7) during the pandemic. This finding was consistent with other analyses.29

We found that women or females experienced small negative changes, in aggregate, during the early part of the pandemic for general mental health, anxiety and depression symptoms. In a sub-study of our database, we separately investigated sex and gender differences in mental health symptoms before and during the pandemic. That study included 29 studies with data from 27 unique cohorts that included data, separately for females or women and for males or men. We found that all estimates of difference in change by sex or gender were close to zero and not statistically significant (general mental health: SMDdifference-change = 0.01, 95% CI [-0.07, 0.10]; anxiety: SMDdifference-change = 0.09, 95% CI [-0.04, 0.22]; depression: SMDdifference-change = 0.10, 95% CI [-0.00, 0.20]).30

Our finding that mental health symptoms did not increase or increased minimally from pre-COVID-19 to during COVID-19 should be interpreted in the context of evidence of pre-existing increases in reported mental health symptoms over time. A 2021 systematic review31 that assessed changes in depression incidence and prevalence over time in the general population from 19 studies published between 1937 to 2018 found a “predominant increasing trend in depression prevalence over time” that the authors concluded was not explainable by study design differences or publication bias alone. Another systematic review32 that included 44 cohorts with different follow-up periods from 42 publications conducted between 1978 and 2015 similarly found an overall global prevalence increase in International Classification of Diseases- or Diagnostic and Statistical Manual of Mental Disorders-based diagnoses (odds ratio of 1.18, 95%-CI: 1.07 to 1.31). Studies that have examined trends in the last 20 years have reported similar findings.33-35 The changes that we found in our review were small enough that they could conceivable be part of this general increase in mental health symptoms over time, although we did not have evidence to evaluate the degree that this may be the case.

**Policy Implications**

In our original review, we concluded that the lack of large-scale declines in mental health during COVID-19 likely reflected both population resilience and government efforts to support mental health. We also highlighted the importance of ongoing surveillance, particularly for groups showing greater vulnerability, and the need for stronger mental health monitoring systems. Our updated results reinforce these conclusions and emphasize the need for funding mechanisms and collaborative efforts to facilitate high-quality data collection and surveillance, particularly where data gaps exist such as in low-income countries and vulnerable groups.

**Strengths and Limitations**

Our systematic review has several strengths. We used rigorous, best-practice methods, searched nine databases (including two Chinese databases) and did not restrict by publication language. An experienced librarian developed our search strategy, and although it was not peer-reviewed due to the urgency to launch early in the pandemic, we cross-checked included studies against other reviews and identified more relevant studies during overlapping periods than any other reviews.

There are also limitations to consider. Many included studies had methodological weaknesses related to sampling, recruitment, and missing data, and we did not include repeated cross-sectional studies or studies with fewer than 100 participants. High heterogeneity was present in most of our meta-analyses, and while we synthesized results for several vulnerable groups (e.g., women or females, children, people with pre-existing conditions), there was limited evidence for others, such as individuals with low socio-economic status or populations from low- and lower-middle-income countries. Almost all upper middle-income country data came from China, which did not allow us to separate potential country income effects. Additionally, we did not assess publication bias, though the largely null findings make it unlikely that this influenced results. Lastly, there was a substantial gap between our final search in 2023 to publication. This was due to the extremely large scope of our search and evaluation process, which was resource-intensive, including funding and staff resources, beyond what we had anticipated. Thus, finalizing our work took longer than we had anticipated. Nonetheless, our evidence synthesis included a longer and more comprehensive search period and many more included studies than any other existing systematic review of COVID-19 mental. health.

**Conclusions**

We reviewed 178 publications containing data from 186 unique cohorts. Across population groups, results suggest that, at a population level, there were no changes or minimal to small changes in general mental health, anxiety symptoms, and depressive symptoms. There were few robust studies with vulnerable groups, however, and it is possible that there are population groups that experienced mental health implications that differed from the general population or other groups that we could analyse.

**Contributions:**

YS, YWu, DBR, AB, and BDT were responsible for the study conception and design. JTB was responsible for the design of the database searches. KL and AK carried out the searches. YS, YWu, SF, LL, XJ, AT, KL, YWang, TDS, NPGD, PD, BT, MDO, AK, CA, CH, RH, AA, OB, DBR, SM, MA, ELN, SH, MCA, DN, LA, ITV, EW, GCYS, GVG, MG, MN, and BDT contributed to data extraction, coding, and evaluation of included studies. YS and SF were responsible for study coordination. YS, YWu, AB, and BDT were involved in data analysis. DA, HB, BA, GCS, CF, AJG, PML, MSM, TM, AN, SS, GT, and MW contributed to interpretation of results as knowledge translation partners. YS and BDT drafted the manuscript. All authors provided a critical review and approved the final manuscript. BDT is the guarantor; he had full access to all the data in the study and takes responsibility for the integrity of the data and the accuracy of the data analyses. BDT is the corresponding author and attests that all listed authors meet authorship criteria and that no others meeting the criteria have been omitted.

**Funding:**

The study was funded by the Canadian Institutes of Health Research (CIHR; PJT-195921; CMS-171703; MS1-173070; GA4-177758; WI2-179944) and McGill Interdisciplinary Initiative in Infection and Immunity Emergency COVID-19 Research Fund (R2-42). YWu was supported by a Fonds de recherche du Québec – Santé (FRQS) Postdoctoral Training Fellowship. TDS and SH were supported by CIHR Canada Graduate Scholarship Masters Awards. ELN was supported by an FRQS Doctoral Research Award and a Canadian Behavioural Interventions Trials Network Platform and CIHR Doctoral Studentship, and BDT was supported by a Tier 1 Canada Research Chair, all outside of the present work. No funder had any role in the design and conduct of the study; collection, management, analysis, and interpretation of the data; preparation, review, or approval of the manuscript; and decision to submit the manuscript for publication.

**Declaration of Competing Interests:**

All authors have completed the ICJME uniform disclosure form at www.icmje.org/coi_disclosure.pdf and declare: no support from any organisation for the submitted work; no financial relationships with any organisations that might have an interest in the submitted work in the previous three years. All authors declare no relationships or activities that could appear to have influenced the submitted work. RH, AB, and BDT declared that they were authors of an included study.S152

**Ethical Approval**:

As this study was a systematic review of published results, it did not require ethical approval.

**Data Sharing**:

Study data and statistical codes are available via the Open Science Framework (https://osf.io/96csg/).

**Transparency:**

The manuscript’s guarantor affirms that the manuscript is an honest, accurate, and transparent account of the study being reported; that no important aspects of the study have been omitted; and that any discrepancies from the study as planned and registered have been explained.

**Dissemination to study participants or patient communities:**

Dissemination of results will be facilitated via posting to the project website (https://www.depressd.ca/covid-19-mental-health), including an infographic with study results; other Canadian and international mental health and COVID-19 knowledge exchange portals; a companion article from a patient partner; social media posting; a press release; and direct communication with members of governments.

**Provenance and peer review:**

Not commissioned; externally peer reviewed.

**CC BY licence:**

The default licence, a CC BY NC licence, is needed.

**SUMMARY BOX**

**What is already known on this topic:**

- Large numbers of studies and media reports concluded that COVID-19 led to widespread decline in population mental health.
- Most existing evidence reviews have been based on cross-sectional studies.
- Our previous systematic review of 137 studies found that mental health was either unchanged or worsened by minimal to small amounts in the general population and subgroups.

**What this study adds:**

- We synthesized evidence from 178 publications with data from 186 unique cohorts that compared general mental health, anxiety symptoms, or depression symptoms during COVID-19 to outcomes prior to COVID-19 in the same participant cohort.
- We did not identify negative changes in mental health at the general population level for anxiety symptoms, but we did find a minimal worsening of general mental health and depression symptoms.
- Among subgroups, only women or females appeared to have experienced worsening of general mental health, anxiety symptoms, and depression symptoms, all by minimal to small amounts.
- Children and adolescents experienced symptoms worsening in general mental health and depression, but not anxiety, both by minimal amounts. Other subgroups experienced changes in no domains or minimal to small changes in one domain.

**REFERENCES**

1. Thombs BD, Bonardi O, Rice DB, et al. Curating evidence on mental health during COVID-19: a living systematic review. *J Psychosom Res*. 2020;133:110113. doi:10.1016/j.jpsychores.2020.110113

2. The DEPRESSD Project. Living systematic review of mental health in COVID-19. Accessed March 27, 2026. https://www.depressd.ca/covid-19-mental-health

3. Glasziou PP, Sanders S, Hoffmann T. Waste in covid-19 research. *BMJ* 2020;369:m1847. doi:10.1136/bmj.m1847

4. Gilbody S, Littlewood E, Gascoyne S, et al. Mitigating the impacts of COVID-19: where are the mental health trials?. *Lancet Psychiatry* 2021;8:647–50. doi: 10.1016/S2215-0366(21)00204-2

5. Pierce M, McManus S, Jessop C, et al. Says who? The significance of sampling in mental health surveys during COVID-19. *Lancet Psychiatry* 2020;7:567-568. doi:10.1016/S2215-0366(20)30237-6

6. Demkowicz O, Panayiotou M, Parsons S, et al. Looking back to move forward: reflections on the strengths and challenges of the COVID-19 UK mental health research response. *Front Psychiatry* 2021;12:622562. doi:10.3389/fpsyt.2021.622562

7. Robinson E, Sutin AR, Daly M, et al. A systematic review and meta-analysis of longitudinal cohort studies comparing mental health before versus during the COVID-19 pandemic in 2020. *J Affect Disord* 2022;296:567–76. doi:10.1016/j.jad.2021.09.098

8. Salanti G, Peter N, Tonia T, et al. The Impact of the COVID-19 pandemic and associated control measures on the mental health of the general population: a systematic review and dose-response meta-analysis. *Ann Intern Med* 2022;175:1560–71. doi:10.7326/M22-1507

9. Madigan S, Racine N, Vaillancourt T, et al. Changes in depression and anxiety among children and adolescents from before to during the COVID-19 pandemic: a systematic review and meta-analysis. *JAMA Pediatr* 2023;177:567. doi:10.1001/jamapediatrics.2023.0846

10. Sun Y, Wu Y, Fan S, et al. Comparison of mental health symptoms before and during the covid-19 pandemic: evidence from a systematic review and meta-analysis of 134 cohorts. *BMJ* 2023;380:e074224. doi:10.1136/bmj-2022-074224

11. Thombs B, Bonardi O, Rice D. Mental health during the COVID-19 pandemic: protocol for a living systematic review of symptom levels, factors associated with symptoms, and intervention effectiveness. Accessed March 27, 2026. https://osf.io/96csg/

12. Page MJ, McKenzie JE, Bossuyt PM, et al. The PRISMA 2020 statement: an updated guideline for reporting systematic reviews. *BMJ* 2021;372:n71. doi:10.1136/bmj.n71

13. Wu Y, Sun Y, Parsons M, et al. Trajectories of changes in mental health symptoms during COVID-19: Evidence from a Systematic Review and Meta-analysis of 284 Studies. [Manuscript in Preparation]. 2026

14. Hall S, Moskovitz C, Pemberton M. Best Practices for Researchers – Text Recycling Research Project. Accessed March 26, 2026. https://textrecycling.org/resources/best-practices-for-researchers/

15. World Health Organization. Rolling updates on coronavirus disease (COVID-19) 2020. Accessed March 27, 2026. <https://www.who.int/emergencies/diseases/novel-coronavirus-2019/events-as-they-happen>

# 16. United Nations. WHO chief declares end to COVID-19 as a global health emergency. Accessed March 27, 2026. https://news.un.org/en/story/2023/05/1136367

17. The World Bank. World Bank Country and Lending Groups – World Bank Data Help Desk. Accessed March 27, 2026. https://datahelpdesk.worldbank.org/knowledgebase/articles/906519-world-bank-country-and-lending-groups

18. Joanna Briggs Institute. The Joanna Briggs Institute Critical Appraisal tools for use in JBI systematic reviews: Checklist for prevalence studies. Accessed March 27, 2026. https://jbi.global/critical-appraisal-tools

19. McGrath S, Zhao X, Steele R, et al. Estimating the sample mean and standard deviation from commonly reported quantiles in meta-analysis. *Stat Methods Med Res* 2020;29:2520–37. doi:10.1177/0962280219889080

20. Hedges L. Estimation of effect size from a series of independent experiments. *Psychol Bull* 1982;92:490-499. doi:10.1037/0033-2909.92.2.490

21. Borenstein M, Hedges LV, Higgins JPT, et al. Effect sizes based on means. In: Borenstein M, Hedges LV, Higgins JPT, et al, eds. Introduction to meta-analysis. West Sussex, UK: Wiley & Sons 2009:Chapter 4.

22. Viechtbauer W. Conducting meta-analyses in R with the metafor package. *J Stat Softw* 2010;36:1-48. doi:10.18637/jss.v036.i03

23. Cohen J. Statistical power analysis for the behavioral sciences. 2nd ed. Hillsdale, NJ: Lawrence Erlbaum Associates 1988. doi:10.4324/9780203771587

24. Policy for managing potentially problematic studies: implementation guidance. Accessed March 27, 2026. https://www.cochranelibrary.com/cdsr/editorial-policies/problematic-studies-implementation-guidance

25. Twenge JM, Joiner TE. U.S. Census Bureau‐assessed prevalence of anxiety and depressive symptoms in 2019 and during the 2020 COVID‐19 pandemic. *Depress Anxiety* 2020;37:954–6. doi:10.1002/da.23077

26. Knudsen AKS, Stene-Larsen K, Gustavson K, et al. Prevalence of mental disorders, suicidal ideation and suicides in the general population before and during the COVID-19 pandemic in Norway: a population-based repeated cross-sectional analysis. *Lancet Reg Health Eur* 2021;4:100071. doi:10.1016/j.lanepe.2021.100071

27. Miao R, Liu C, Zhang J, et al. Impact of the COVID-19 pandemic on the mental health of children and adolescents: a systematic review and meta-analysis of longitudinal studies. *J Affect Disord* 2023;340:914–22. doi:10.1016/j.jad.2023.08.070

28. da Cunha Varella AP, Griffin E, Khashan A, Kabir Z. Suicide rates before and during the COVID-19 pandemic: a systematic review and meta-analysis. *Soc Psychiatry Psychiatr Epidemiol* 2024;59:1897–905. doi:10.1007/s00127-024-02617-1

29. Pirkis J, John A, Shin S, et al. Suicide trends in the early months of the COVID-19 pandemic: an interrupted time-series analysis of preliminary data from 21 countries. *Lancet Psychiatry* 2021;8(7):P579-588. doi:[10.1016/S2215-0366(21)00091-2](https://www.thelancet.com/journals/lanpsy/article/PIIS2215-0366(21)00213-3/fulltext)

30. Sung GCY, Wu Y, Fan S, et al. Mental health symptom changes by sex or gender during COVID-19 compared to pre-pandemic: a systematic review and meta-analysis update. *medRxiv* 2026;26344371. doi:10.64898/2026.01.22.26344371

31. Moreno-Agostino D, Wu Y-T, Daskalopoulou C, et al. Global trends in the prevalence and incidence of depression: a systematic review and meta-analysis. *J Affect Disord* 2021;281:235–43. doi:10.1016/j.jad.2020.12.035

32. Richter D, Wall A, Bruen A, et al. Is the global prevalence rate of adult mental illness increasing? Systematic review and meta-analysis. *Acta Psychiatr Scand* 2019;140:393–407. doi:10.1111/acps.13083

33. Goodwin RD, Weinberger AH, Kim JH, et al. Trends in anxiety among adults in the United States, 2008-2018: rapid increases among young adults. *J Psychiatr Res* 2020;130:441–6. doi:10.1016/j.jpsychires.2020.08.014

34. Duffy ME, Twenge JM, Joiner TE. Trends in mood and anxiety symptoms and suicide-related outcomes among U.S. undergraduates, 2007-2018: evidence from two national surveys. *J Adolesc Health* 2019;65:590–8. doi:10.1016/j.jadohealth.2019.04.033

35. Slee A, Nazareth I, Freemantle N, et al. Trends in generalised anxiety disorders and symptoms in primary care: UK population-based cohort study. *Br J Psychiatry* 2021;218:158–64. doi:10.1192/bjp.2020.159

**Figure 1.** PRISMA flow diagram.

**Previous studies**

**Identification of new studies via databases and registers**

Records removed *before screening*:

Duplicate records removed (n = 131,095)

Cohorts included in previous version of review (n = 139)*

Publications of cohorts included in previous version of review (n = 137)

Records identified from:

MEDLINE (n = 89,552); EMBASE (n = 29,503); PsycINFO (n = 19,068); CINAHL (n = 7,782); Web of Science (n = 30,174); CNKI (n = 5,193); Wanfang (n = 1,684)

MedRxiv (n = 2,106); OSF (N = 658)

**Identification**

Titles or abstracts screened for eligibility (n = 54,615)

Titles or abstracts excluded (n = 53,006)

Publications excluded:

- Not original human data or case study or case series (n = 10)

- Not study of population (N ≥ 100) in COVID-19 (n = 106)

- Not study that reported mental health symptom changes over demarcated period (n = 1,214)

- Eligibility could not be determined (n = 49)

Full text publications reviewed for eligibility (n = 1,609)

Did not assess symptoms both pre- and during pandemic (n = 143)

Publications with longitudinal data collected (n = 230)

**Screening**

Publications not included:

-Only assessed outcomes other than anxiety or depression or mental health function (n = 2)

-Only reported dichotomous results (n = 22)

-Only reported results in other formats that could not be converted to SMDs (e.g., model parameters, change scores (n = 12)

-Duplicate sample of already included publications (n = 7)

-Implausible or discrepant data patterns (n = 4)

Publications with longitudinal pre- and during-COVID data (n = 87)

Publications eligible for review (n = 40)

Publication identified in review of other reviews (n = 1)

New cohorts included in review

(n = 47)

Publications of new included cohorts

(n = 41)

Total cohorts included in review

(n = 186)**

Publications of total included cohorts

(n = 178)

**Included**

*Previous publication reported 134 cohorts from 137 publications to account for multiple publications with data from same samples but not accounting for > 1 distinct samples in a single publication. In the update, we have counted distinct samples within publications as separate cohorts, and we have renumbered cohorts included in the previous version to reflect this.

**8 publications included data from two independent cohorts

**Table 1. Meta-analyses of Continuous General Mental Health, Anxiety Symptoms, and Depression Symptoms by Population Group (updated results in first row and results from Sun et al. (2023) in second row in italics)**

|  | **General Mental Health** | | |  | **Anxiety Symptoms** | | |  | **Depression Symptoms** | | |
| --- | --- | --- | --- | --- | --- | --- | --- | --- | --- | --- | --- |
|  | **N Cohorts (Participants)** | **Hedges g SMDa (95% CI)** | **I2** |  | **N Cohorts (Participants)** | **Hedges g SMDa (95% CI)** | **I2** |  | **N Cohorts (Participants)** | **Hedges g SMDa (95% CI)** | **I2** |
| General Population | 15b (34,135) | 0.11 (0.01 to 0.20)c | 97% |  | 6 (3,291) | 0.07 (-0.29 to 0.42) | 98% |  | 10 (23,826) | 0.07 (0.00 to 0.14) | 82% |
|  | *11 (30,185)* | *0.11 (-0.00 to 0.22)* | *97%* |  | *4 (2,632)* | *0.05 (-0.04 to 0.13)* | *37%* |  | *4 (3,470)* | *0.12 (0.01 to 0.24)* | *81%* |
| Women or Females | 7d (11,224) | 0.14 (0.00 to 0.28)e | 94% |  | 8f (3,875) | 0.18 (0.09 to 0.27) | 54% |  | 18f,g (16,258) | 0.15 (0.05 to 0.26) | 95% |
|  | *6d (10,329)* | *0.22 (0.08 to 0.35)* | *91%* |  | *5f (3,500)* | *0.20 (0.12 to 0.29)* | *41%* |  | *7f,g (3,851)* | *0.22 (0.05 to 0.40)* | *89%* |
| Men or Males | 5h (13,740) | 0.07 (-0.16 to 0.31)i | 99% |  | 5j (2,400) | -0.05 (-0.18 to 0.07) | 72% |  | 11k (12,669) | 0.04 (-0.08 to 0.16) | 95% |
|  | *6h (11,546)* | *0.11 (-0.12 to 0.35)* | *98%* |  | *4j (1,271)* | *0.07 (-0.01 to 0.14)* | *0%* |  | *7k (3,905)* | *0.01 (-0.14 to 0.16)* | *82%* |
| Older Adults | 11 (9,964)l | 0.06 (-0.06 to 0.18)m | 93% |  | 8f (10,096) | 0.12 (-0.01 to 0.24) | 94% |  | 11f,n (25,059) | 0.21 (0.08 to 0.34) | 98% |
|  | *11 (9,960)*l | *-0.01 (-0.12 to 0.11)* | *93%* |  | *6f (7,193)* | *0.14 (-0.00 to 0.28)* | *93%* |  | *7f (7,419)* | *0.22 (0.06 to 0.38)* | *95%* |
| Young Adults | 3 (4,381) | 0.11 (-0.14 to 0.37)o | 96% |  | 3 (4,798) | 0.07 (-0.08 to 0.22) | 87% |  | 6 (10,614) | 0.04 (-0.08 to 0.15) | 94% |
|  | *2 (4,221)* | *0.16 (-0.07 to 0.39)* | *96%* |  | *2 (4,602)* | *0.05 (-0.16 to 0.27)* | *95%* |  | *4 (8,043)* | *0.02 (-0.15 to 0.18)* | *96%* |
| University Students | 12p,q (12,392) | -0.01 (-0.12 to 0.10) | 93% |  | 20p (19,058) | -0.08 (-0.20 to 0.04) | 97% |  | 28p,q (33,372) | 0.12 (-0.00 to 0.24) | 98% |
|  | *6p (6,957)* | *0.00 (-0.17 to 0.17)* | *95%* |  | *16p (12,642)* | *-0.07 (-0.21 to 0.06)* | *96%* |  | *19p (26,164)* | *0.14 (0.01 to 0.26)* | *98%* |
| Children and Adolescents | 26r,s,t (27,888) | 0.10 (0.03 to 0.17) | 94% |  | 23 (31,712) | 0.04 (-0.03 to 0.11) | 94% |  | 30 (44,286) | 0.09 (0.03 to 0.16) | 95% |
|  | *16 (11,505)* | *0.19 (-0.05 to 0.42)* | *99%* |  | *8 (12,064)* | *0.02 (-0.12 to 0.16)* | *96%* |  | *10 (11,679)* | *0.06 (-0.08 to 0.20)* | *96%* |
| Parents | 6 r,s,t (2,524) | 0.13 (-0.10 to 0.36) | 94% |  | 2 (547) | 0.09 (-0.22 to 0.39) | 81% |  | 9 (3,742) | 0.14 (0.03 to 0.25) | 81% |
|  | *3 (932)* | *0.39 (0.21 to 0.56)* | *57%* |  | *1 (147)* | *0.25 (0.02 to 0.49)* | *--------* |  | *5 (1,639)* | *0.15 (-0.05 to 0.35)* | *87%* |
| People with Pre-existing Medical Conditions | 13 (7,204) | 0.10 (0.01 to 0.19) | 84% |  | 17f (7,837) | 0.07 (-0.02 to 0.15) | 84% |  | 23f (11,864) | 0.01 (-0.05 to 0.07) | 76% |
|  | *12 (6,511)* | *0.10 (-0.01 to 0.20)* | *86%* |  | *11 (5,775)* | *0.08 (-0.04 to 0.21)* | *89%* |  | *9 (9,496)* | *0.05 (-0.04 to 0.13)* | *84%* |
| People with Pre-existing Mental Health Conditions | 4 (985) | 0.08 (-0.33 to 0.50) | 95% |  | 4 (12,507) | 0.03 (-0.22 to 0.29) | 88% |  | 4 (12,497) | -0.06 (-0.08 to -0.03) | 0% |
|  | *2 (457)* | *-0.22 (-0.35 to -0.09)* | *0%* |  | *3 (12,362)* | *0.12 (-0.11 to 0.35)* | *80%* |  | *3 (12,352)* | *-0.05 (-0.08 to -0.03)* | *0%* |
| Medical Staff | 1b (331) | 0.17 (0.02 to 0.32) | -------- |  | -------- | -------- | -------- |  | 2 (1,788) | 0.02 (-0.05 to 0.08) | 0% |
|  | *--------* | *--------* | *--------* |  | *--------* | *--------* | *--------* |  | *1 (180)* | *0.11 (-0.09 to 0.32)* | *--------* |
| Teachers | -------- | -------- | -------- |  | 1 (350) | 0.71 (0.56 to 0.86) | -------- |  | 1 (350) | 0.38 (0.23 to 0.53) | -------- |
|  | *--------* | *--------* | *--------* |  | *--------* | *--------* | *--------* |  | *--------* | *--------* | *--------* |
| Caregivers | -------- | -------- | -------- |  | 1 (177) | 0.15 (-0.06, 0.36) | -------- |  | 1 (177) | 0.08 (-0.13, 0.29) | -------- |
|  | *--------* | *--------* | *--------* |  | *--------* | *--------* | *--------* |  | *--------* | *--------* | *--------* |
| Prisoners | -------- | -------- | -------- |  | 1 (803) | -0.17 (-0.27, -0.08) | -------- |  | -------- | -------- | -------- |
|  | *--------* | *--------* | *--------* |  | *--------* | *--------* | *--------* |  | *--------* | *--------* | *--------* |
| Sexual or Gender Minorities | -------- | -------- | -------- |  | 3 (3,743) | 0.23 (-0.09 to 0.54) | 98% |  | 3 (3,741) | 0.19 (0.10 to 0.28) | 67% |
|  | *--------* | *--------* | *--------* |  | *3 (3,743)* | *0.23 (-0.09 to 0.54)* | *98%* |  | *3 (3,741)* | *0.19 (0.10 to 0.28)* | *67%* |

CI=confidence interval; SMD=standardized mean difference.

aPositive effect sizes indicate worse mental health during COVID-19 pandemic compared with pre-COVID-19. bMedical staff and other employees from Hoang et alS8 were treated as separate cohorts although from one publication. cSensitivity analysis conducted with results from Pierce et alS14 from fixed effects model that estimated within-person change accounting for pre-COVID-19 trends rather than difference between 2020 and 2019 outcomes: SMD 0.10 (95% CI 0.00 to 0.19), I2=96.9%. See Supplementary Figure 1k. dWomen or females from Megias-Robles et alS11 (n = 67) included in Sun et al. (2023), were not included in the updated results, which did not include subgroups with < 100 participants. eSensitivity analysis conducted with results from Pierce et alS14 from fixed effects regression model that estimated within-person change accounting for pre-COVID-19 trends rather than difference between 2020 and 2019 outcomes: SMD 0.12 (95% CI -0.01 to 0.25), I2=92.9%. See Supplementary Figure 1l. fCancer survivors and matched controls from Rentscher et alS34 were counted as separate cohorts in the updated results, but were counted as a single cohort in Sun et al. (2023). gWomen/females from Frank et alS138 (n = 95) included in Sun et al. (2023), were not included in the updated results, which did not include subgroups with < 100 participants. hMen/males from Megias-Robles et alS11 (n = 35) and Savage et alS71 (n = 60) included in Sun et al. (2023), were not included in the updated results, which did not include subgroups with < 100 participants. iSensitivity analysis conducted with results from Pierce et alS14 from fixed effects regression model that estimates within-person change accounting for pre-COVID-19 trends rather than difference between 2020 and 2019 outcomes: SMD 0.05 (95% CI -0.19 to 0.28), I2=98.6%. See Supplementary Figure 1m. jMen or males from Lim et alS159 (n = 21) and Saraswathi et alS70 (n = 78) included in Sun et al. (2023), were not included in the updated results, which did not include subgroups with < 100 participants. kMen or males from Frank et alS138 (n = 85), Lim et alS159 (n = 21), and Saraswathi et alS70 (n = 78) included in Sun et al. (2023), were not included in the updated results, which did not include subgroups with < 100 participants. lSun (2023) included results from Wang, Y et al (N = 2,745), whereas the updated analysis included results from a larger sample from the same cohort (Li, Jie et alS31, N = 2,749) since our rule was to use the larger sample with multiple publications. mSensitivity analysis conducted with results from Pierce et alS14 from fixed effects regression model that estimates within-person change accounting for pre-COVID-19 trends rather than difference between 2020 and 2019 outcomes: SMD 0.05 (95% CI -0.07 to 0.17), I2=93.3%. See Supplementary Figure 1n. nParticipants in the Health and Retirement Study and the English Longitudinal Study of Ageing from Zheng et alS40 were treated as separate cohorts although from one publication. oSensitivity analysis conducted with results from Pierce et alS14 from fixed effects regression model that estimates within-person change accounting for pre-COVID-19 trends rather than difference between 2020 and 2019 outcomes: SMD 0.09 (95% CI -0.12 to 0.30), I2=94.2%. See Supplementary Figure 1o. pStudents from Lithuania and students from Germany from Truskauskaite-Kuneviciene et alS73 were treated as separate cohorts in the updated results, but as a single cohort in Sun et al. (2023), despite originating from one publication. qStudents from China and the United States from Wang, Cixin et alS75 were treated as separate cohorts although from one publication. rChildren aged 10-13 years and their parents from Achterberg et alS83 were treated as separate cohorts although from one publication. sChildren aged 10-14 years and their parents from Baranov et alS88 were treated as separate cohorts although from one publication. tChildren and adolescents aged 6-17 years and their parents from Bosch et alS90 were treated as separate cohorts although from one publication.
